# Supplementary material
Source: Springer Nature journal article supplement (https://www.springerprofessional.de/resource/supplementary/13638_2014_969_MOESM14_ESM.pdf/11898904)

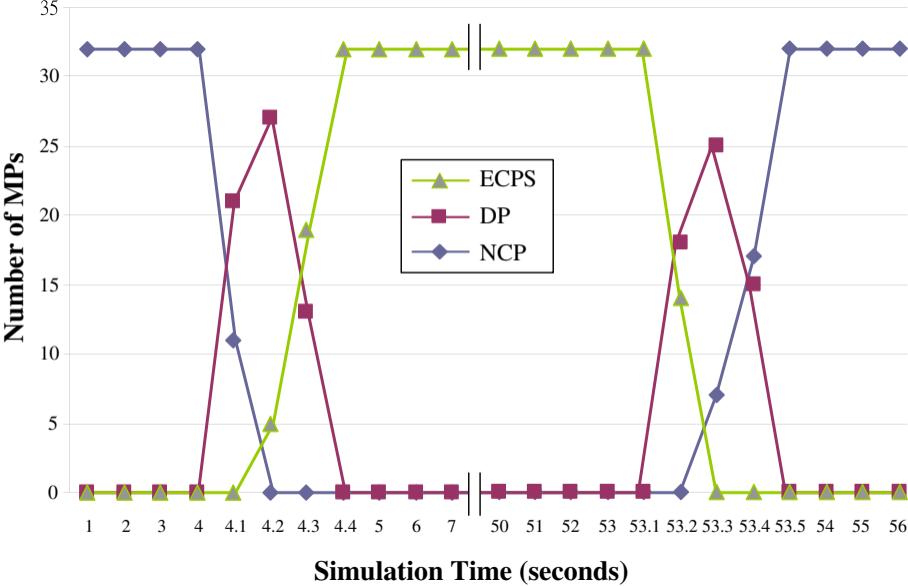

Supplement: MOESM14 [file 11898904]
